# Supplementary material for: Programmable RNA Targeting Using CasRx in Flies
Source: PubMed Central journal article supplement (PMC7307691; doi:10.1089/crispr.2020.0018), 2020-06-17
Supplement: Supp_FigS2.pdf [file Supp_FigS2.pdf]

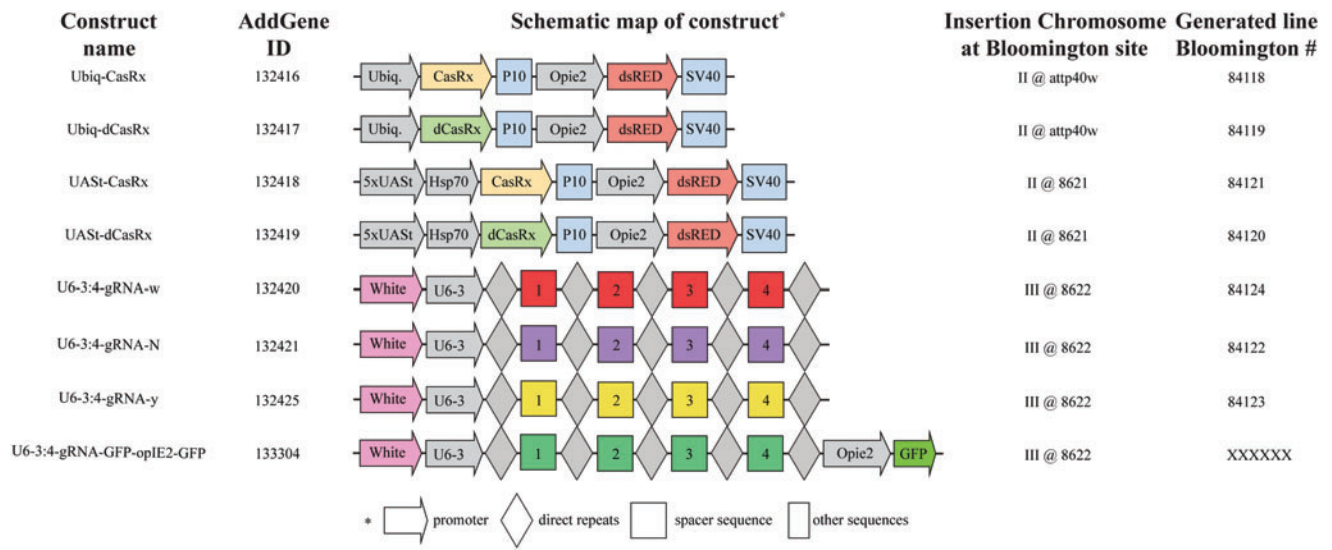

**Supplementary Fig. S2.** Schematic representation of constructs generated for this study. All constructs used in this study are depicted here along with addgene ID, insertion site, and Bloomington stock number.
