# Supplementary material for: Programmable RNA Targeting Using CasRx in Flies
Source: PubMed Central journal article supplement (PMC7307691; doi:10.1089/crispr.2020.0018), 2020-06-17
Supplement: Supp_FigS3.pdf [file Supp_FigS3.pdf]

| Development Stage      | Expression Level |       |        |
|------------------------|------------------|-------|--------|
|                        | notch            | white | yellow |
| embryo 00-02hr         | 44               | 0     | 0      |
| embryo 02-04hr         | 49               | 0     | 1      |
| embryo 04-06hr         | 86               | 2     | 0      |
| embryo 06-08hr         | 124              | 3     | 0      |
| embryo 08-10hr         | 102              | 4     | 0      |
| embryo 10-12hr         | 52               | 9     | 0      |
| embryo 12-14hr         | 53               | 8     | 0      |
| embryo 14-16hr         | 41               | 9     | 2      |
| embryo 16-18hr         | 19               | 9     | 26     |
| embryo 18-20hr         | 10               | 7     | 28     |
| embryo 20-22hr         | 10               | 4     | 19     |
| embryo 22-24hr         | 10               | 4     | 21     |
| larva L1               | 6                | 9     | 3      |
| larva L2               | 4                | 9     | 11     |
| larva L3 12hr          | 4                | 9     | 9      |
| larva L3 puffstage 1-2 | 7                | 8     | 0      |
| larva L3 puffstage 3-6 | 21               | 13    | 0      |
| larva L3 puffstage 7-9 | 23               | 21    | 0      |
| white prepupa          | 29               | 30    | 0      |
| prepupa 12hr           | 30               | 10    | 1      |
| pupa 1d                | 52               | 9     | 0      |
| pupa 2d                | 21               | 24    | 26     |
| pupa 3d                | 9                | 12    | 47     |
| pupa 4d                | 6                | 6     | 2      |
| adult male 01 day      | 4                | 11    | 2      |
| adult male 05 day      | 3                | 11    | 0      |
| adult male 30 day      | 3                | 11    | 0      |
| adult female 01 day    | 14               | 7     | 1      |
| adult female 05 day    | 13               | 3     | 0      |
| adult female 30 day    | 15               | 4     | 0      |

  

|                                    |
|------------------------------------|
| no expression (0-0)                |
| Very low expression (1-3)          |
| Low expression (4-10)              |
| Moderate Expression (11-25)        |
| Moderately High expression (26-50) |
| High expression (51-100)           |
| Very high expression (101-1000)    |
| Extremely high expression (>1000)  |

**Supplementary Fig. S3.** modENCODE transcript expression relative to *Drosophila melanogaster* development. Black box indicates which developmental period was chosen for RNA sequencing of samples for the analysis of CasRx-mediated transcript reduction in Ubiq-CasRx versus Ubiq-dCasRx comparison. Not included: GFP first instar larvae were chosen for analysis of *GFP* transcript reduction. GFP, green fluorescent protein.
