# Supplementary material for: Programmable RNA Targeting Using CasRx in Flies
Source: PubMed Central journal article supplement (PMC7307691; doi:10.1089/crispr.2020.0018), 2020-06-17
Supplement: Supp_FigS4.pdf [file Supp_FigS4.pdf]

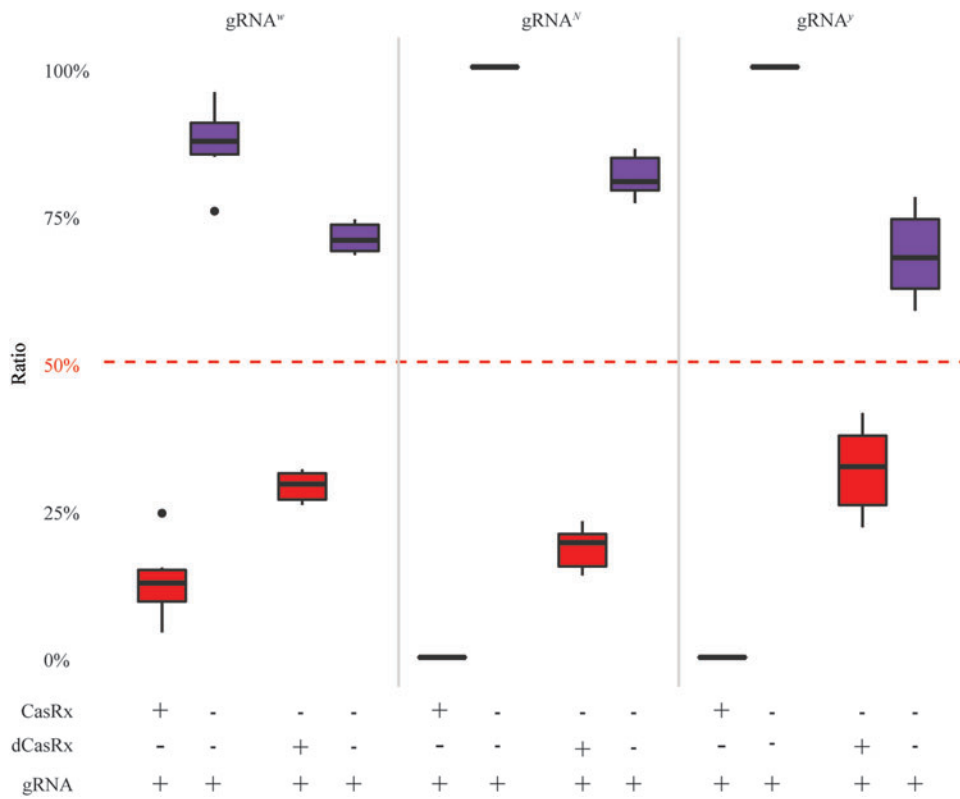

**Supplementary Fig. S4.** Complete inheritance data for bidirectional crosses. Complete inheritance plot for the bidirectional crosses featured in Fig 2. The plot includes all genotypes scored in all crosses between either Ubiq-CasRx or Ubiq-dCasRx and a respective gRNA<sup>array</sup>. In all crosses, gRNA<sup>array</sup>-only inheritance is dramatically higher than transheterozygote inheritance rates, including for Ubiq-dCasRx crosses.
