# Supplementary material for: Programmable RNA Targeting Using CasRx in Flies
Source: PubMed Central journal article supplement (PMC7307691; doi:10.1089/crispr.2020.0018), 2020-06-17
Supplement: Supp_FigS5.pdf [file Supp_FigS5.pdf]

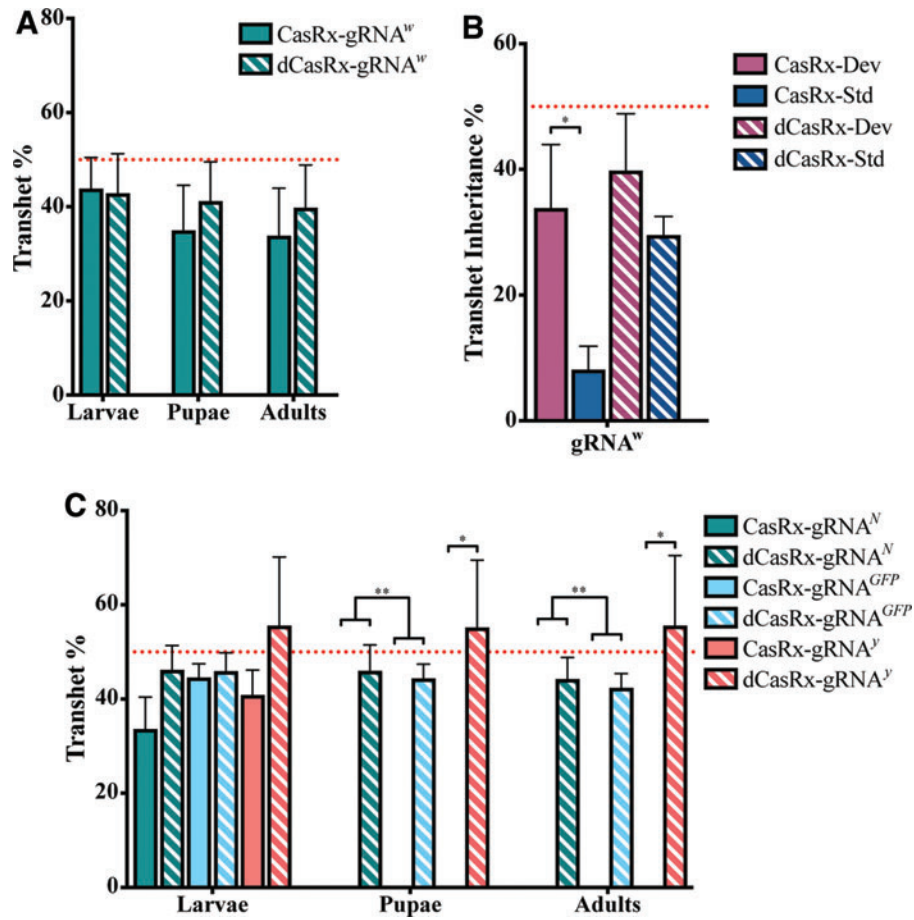

**Supplementary Fig. S5.** Development-related inheritance and lethality of Ubiqu-CasRx and Ubiqu-dCasRx transheterozygotes. **(A–B)** Transheterozygote percentages at larval, pupal, and adult developmental periods for each gRNA<sup>array</sup> that produced an observable phenotype (*w*). There were no significant differences in inheritance. **(C)** Transheterozygote percentages through larval, pupal, and adult development periods for each gRNA<sup>array</sup> that produced a lethal phenotype (*N*, *y*, *GFP*). No Ubiqu-CasRx transheterozygotes developed beyond larvae. *N*, *Notch* gene; *w*, *white* gene; *y*, *yellow* gene.
