# Supplementary material for: Programmable RNA Targeting Using CasRx in Flies
Source: PubMed Central journal article supplement (PMC7307691; doi:10.1089/crispr.2020.0018), 2020-06-17
Supplement: Supp_FigS6.pdf [file Supp_FigS6.pdf]

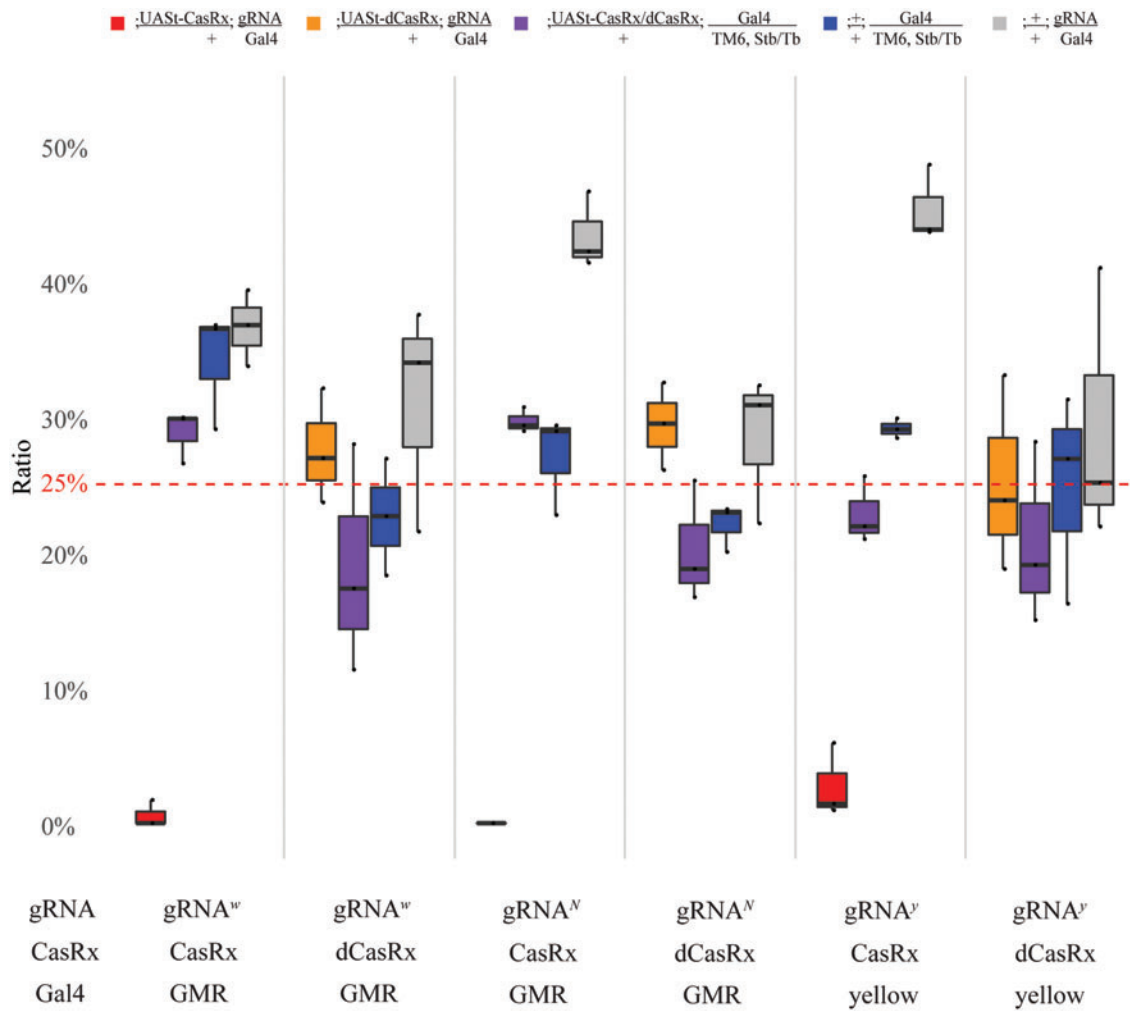

**Supplementary Fig. S6.** Complete inheritance data for binary Gal4/UAS crosses. The plot includes all genotypes scored in all crosses for UAS-CasRx and UAS-dCasRx. For all five gRNA<sup>array</sup> targets, the inheritance of transheterozygous progeny expressing UAS-CasRx, a Gal4 driver, and a gRNA<sup>array</sup> are lower compared with the other nontransheterozygous flies and compared with their corresponding dCasRx control group expressing UAS-dCasRx, a Gal4 driver, and a gRNA<sup>array</sup>. dCasRx, catalytically inactive negative control.
